# Supplementary material for: Phenotype Restricted Genome-Wide Association Study Using a Gene-Centric Approach Identifies Three Low-Risk Neuroblastoma Susceptibility Loci
Source: PLOS journal article supplement (doi:10.1371/journal.pgen.1002026), 2011-03-17
Supplement: S9 (10.1371/journal.pgen.1002026.s009) [file journal.pgen.1002026.s009]

**Table S2:** Summary of clinical and genomic information of neuroblastoma cases

| **Characteristics** | **Categories** | **Overall Discovery** | **Low-risk Discovery** | **Overall Replication** | **Low-risk Replication** |
| --- | --- | --- | --- | --- | --- |
| Age | < 1 year | 540 (33.2%) | 271 (47.2%) | 124 (36.0%) | 52 (46.9%) |
|  1 year | 962 (59.1%) | 279 (48.6%) | 219 (63.7%) | 59 (53.1%) |
| unknown | 125 (7.7%) | 24 (4.2%) | 1 (0.3%) | 0 (0.0%) |
| INSS Stage | 1,2A,2B,3,4s | 851 (52.3%) | 547 (95.4%) | 187 (54.4%) | 111(100%) |
| 4 | 660 (40.6%) | 12 (2.1%) | 149 (43.4%) | 0 (0.0%) |
| Unknown | 116 (7.1%) | 15 (2.6%) | 8 (2.3%) | 13(0%) |
| *MYCN* Status | Not Amplified | 1181 (72.6) | 543 (94.6%) | 256 (77.0%) | 107 (96.4%) |
| Amplified | 257 (15.8%) | 16 (2.8%) | 49 (14.2%) | 1 (0.9%) |
| Unknown | 189 (11.6%) | 15 (2.6%) | 30 (8.7%) | 3 (2.7%) |
| DNA Index | Hyperdiploid | 623 (38.3%) | 297 (51.7%) | - | - |
| Diploid | 308 (18.9%) | 113 (19.7%) | - | - |
| Unknown | 696 (42.8%) | 164 (28.6%) | - | - |
| Histology | Favourable | 682 (41.9%) | 412 (71.8%) | 172 (50.0%) | 90 (81.1%) |
| Unfavourable | 539 (33.1%) | 115 (20.0%) | 129 (27.5%) | 20 (18.0%) |
| Unknown | 406 (25.0%) | 47 (8.2%) | 43 (12.5%) | 1 (0.9%) |
| Risk Level | High | 648 (39.8%) | 0 (0.0%) | 134 (39.0%) | 0 (0.0%) |
| Low/Intermediate | 805 (49.5%) | 574 (100%) | 191 (55.5%) | 111 (100%) |
| Unknown | 174 (10.7%) | 0 (0.0%) | 19 (5.5%) | 0 (0.0%) |
